# Supplementary material for: 1,2,3-Triazoles: Controlled Switches in Logic Gate Applications
Source: MDPI journal article supplement (doi:10.3390/s23157000), 2023-08-07
Supplement: s1 [file s1]

# 1,2,3-Triazoles: Controlled Switches in Logic Gate Applications

Debanjana Ghosh <sup>1,2</sup>, Austin Atkinson <sup>1</sup>, Jaclyn Gibson <sup>1</sup>, Harini Subbaiahgari <sup>2</sup>, Weihua Ming <sup>1</sup>, Clifford Padgett <sup>3</sup>, Karelle S. Aiken <sup>1</sup> and Shainaz M. Landge <sup>1,\*</sup>

<sup>1</sup> Department of Chemistry and Biochemistry, Georgia Southern University (Statesboro Campus), 521 College of Education Drive, Statesboro, GA 30460-8064, USA; dghosh@siue.edu (D.G.)

<sup>2</sup> Department of Chemistry, Science Building West, Southern Illinois University Edwardsville, Edwardsville, IL 62026-1652, USA

<sup>3</sup> Department of Chemistry and Biochemistry, Georgia Southern University (Armstrong Campus), 11935 Abercorn Street, Savannah, GA 31419, USA

\* Correspondence: slandge@georgiasouthern.edu

## Supporting Information

### Table of Contents

|                                                                                                                     |       |
|---------------------------------------------------------------------------------------------------------------------|-------|
| Synthetic Scheme                                                                                                    | 2     |
| <sup>1</sup> H NMR spectrum of <b>PTP</b>                                                                           | 3-4   |
| <sup>13</sup> C NMR spectrum of <b>PTP</b>                                                                          | 5-6   |
| Absorption spectra of <b>PTP</b> +F <sup>-</sup> , H <sub>2</sub> PO <sub>4</sub> <sup>-</sup> and OAc <sup>-</sup> | 7     |
| Absorption and Fluorescence spectra of <b>PTP</b> +F <sup>-</sup> with metals                                       | 8     |
| Stacked <sup>1</sup> H NMR spectrum of <b>PTP</b> +TBAF+Silver                                                      | 9     |
| Stacked <sup>1</sup> H NMR spectrum of <b>PTP</b> +TBAF+Aluminum                                                    | 10    |
| Stacked <sup>1</sup> H NMR spectrum of <b>PTP</b> +TBAF+Cadmium                                                     | 11    |
| Stacked <sup>1</sup> H NMR spectrum of <b>PTP</b> +TBAF+Chromium                                                    | 12    |
| Stacked <sup>1</sup> H NMR spectrum of <b>PTP</b> +TBAF+Iron(III)                                                   | 13    |
| Stacked <sup>1</sup> H NMR spectrum of <b>PTP</b> +TBAF+Iron(II)                                                    | 14    |
| Benesi-Hildebrand (B-H) plots and calculation of equilibrium constants for the PTP-Fluoride- metals combination     | 15-16 |
| Single Crystal X-ray data                                                                                           | 17-21 |

## Synthetic Scheme:

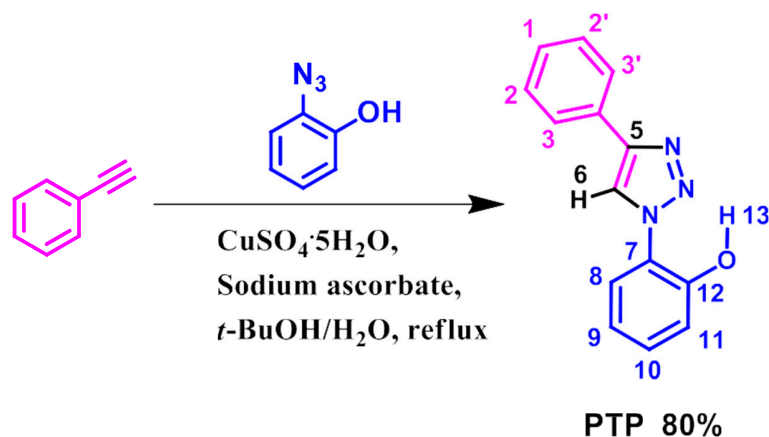

**Scheme S1:** The synthesis of **PTP** and its detailed characterization was published elsewhere by our group.<sup>1</sup>

### Characterization of probe PTP:

**<sup>1</sup>H-NMR** [400 MHz, CD<sub>3</sub>CN]  $\delta$  8.68 (*s*, HO), 8.65 (*s*, 1-H), 7.96 (*dd*, 2-H, 1.3, 7.5Hz), 7.68 (*dd*, 1-H, 1.6, 8.0Hz), 7.50 (*t*, 2-H, 7.4Hz), 7.41 (*t*, 1-H, 7.5Hz), 7.39 (*dd*, 1-H, 1.6, 7.4Hz), 7.17 (*dd*, 1-H, 1.3, 8.3Hz), 7.09 (*td*, 1-H, 1.3, 7.4Hz); **<sup>13</sup>C-NMR** [100 MHz, CD<sub>3</sub>CN]  $\delta$  149.1, 146.9, 130.4, 130.1, 128.9, 128.3, 125.6, 124.0, 123.3, 121.1, 120.5, 117.8; **ESI-MS** for **PTP**:  $m/z$  = 238.05 [M+H]<sup>+</sup>; *calculated* value for C<sub>14</sub>H<sub>11</sub>N<sub>3</sub>O = 237, *found* from experiment 238.05. **HRMS** (M + H)<sup>+</sup> *calculated* for C<sub>14</sub>H<sub>11</sub>N<sub>3</sub>O = 238.0975, *found* = 238.0965.

### Reference:

1. Ghosh, D., Rhodes, S., Hawkins, K., Winder, D., Atkinson, A., Ming, W., Padgett, C., Orvis, J., Aiken, K. and Landge, S., **2015**. A simple and effective 1, 2, 3-triazole based “turn-on” fluorescence sensor for the detection of anions. *New Journal of Chemistry*, 39(1), 295-303.

## Nuclear Magnetic Resonance Spectroscopy Characterization of PTP:

### PTP, $^1\text{H}$ NMR Spectrum

(a)

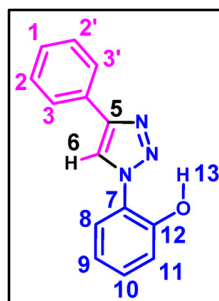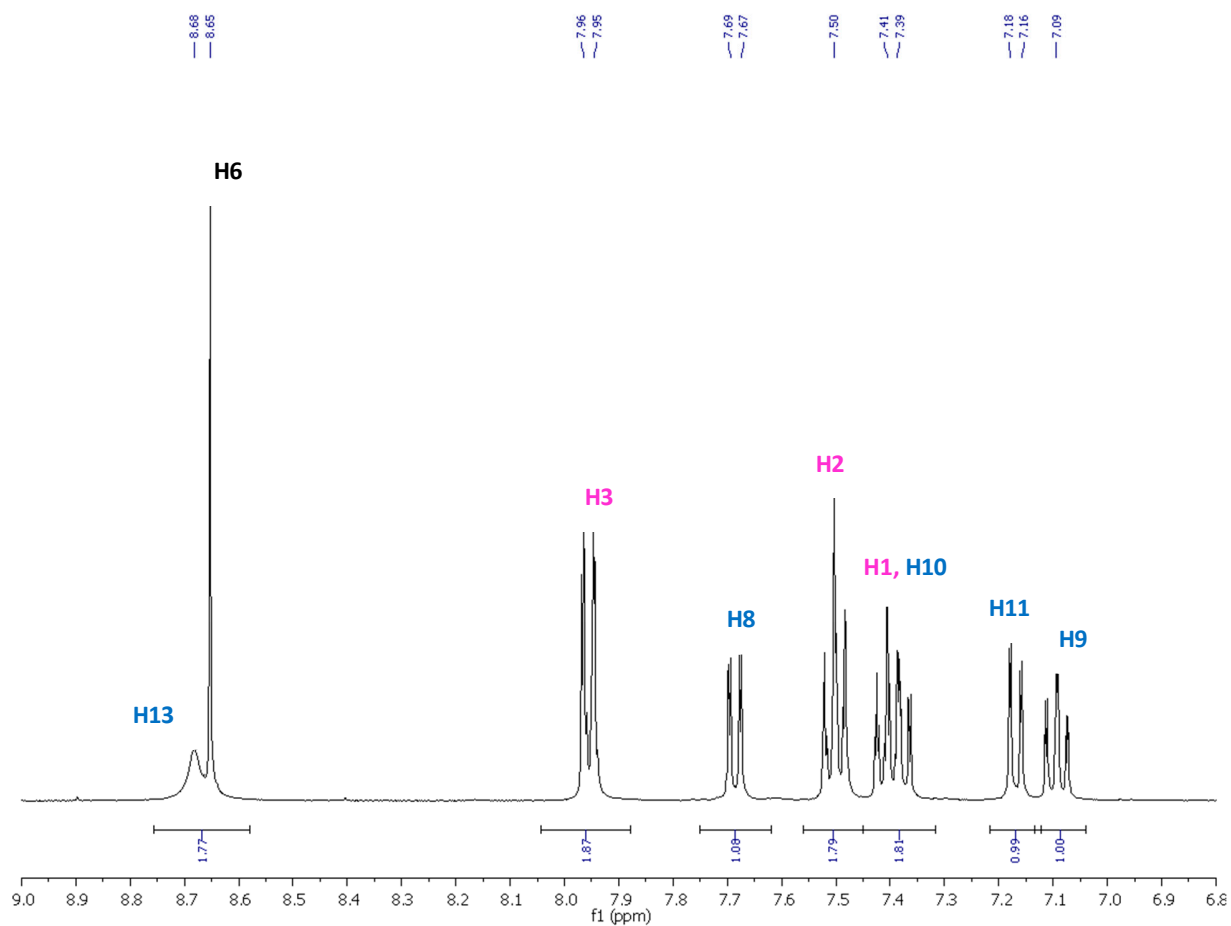

sensor-4-cd3cn-1-pure\_PROTON\_01

8.67 8.65 7.97 7.95 7.94 7.70 7.70 7.68 7.68 7.62 7.50 7.50 7.46 7.46 7.43 7.41 7.39 7.39 7.38 7.38 7.37 7.35 7.35 7.18 7.15 7.15 7.12 7.12 7.10 7.10 7.09 7.09 2.15 2.15 2.15

f1 (ppm)

4

PTP,  $^{13}\text{C}$  NMR Spectrum

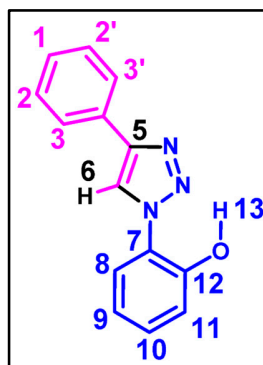

(a)

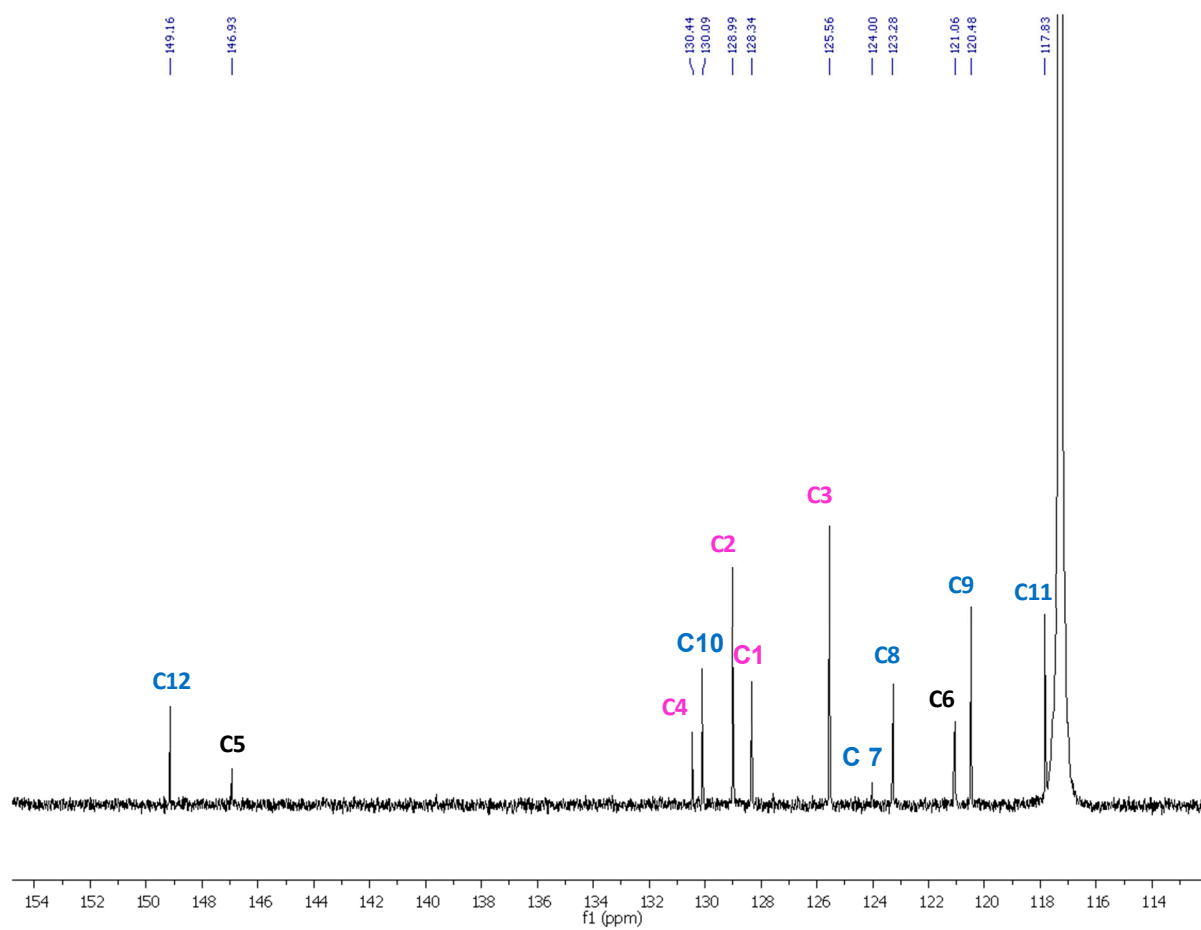

(b)

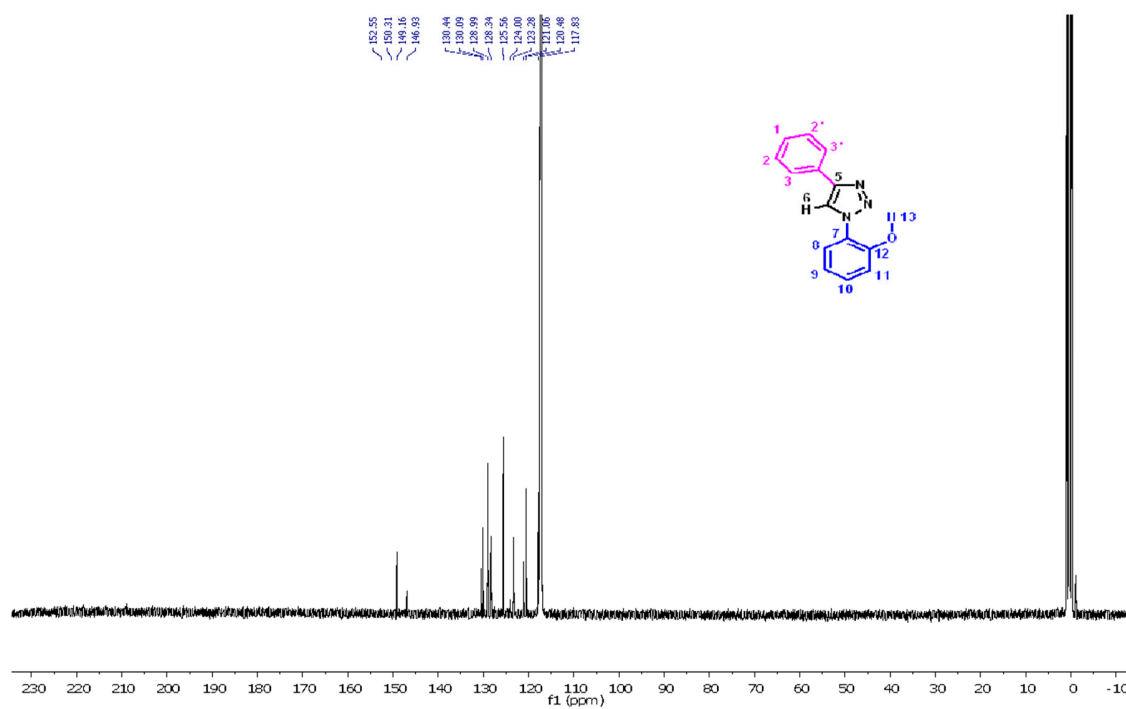

**Figure S2:** NMR spectra ( $^{13}\text{C}$  = 100 MHz,  $\text{CD}_3\text{CN}$ , RT) of **PTP**. (a)  $^{13}\text{C}$ -NMR spectrum showing the expansion from 112-155 ppm. (b) Full  $^{13}\text{C}$ -NMR spectrum of **PTP**.

### Absorption spectra of PTP+F<sup>-</sup>, H<sub>2</sub>PO<sub>4</sub><sup>-</sup>, and OAc<sup>-</sup>

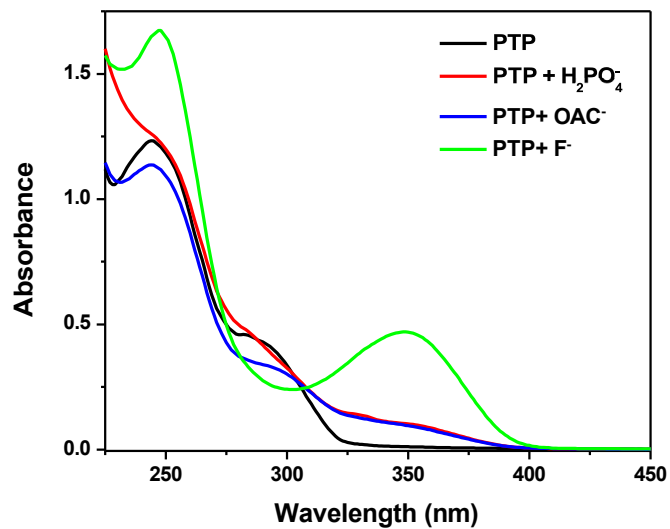

**Figure S3:** Absorption spectra of **PTP** ( $\sim 1.7 \times 10^{-5}$  mol/L) (black line) with the addition of the tetrabutylammonium (TBA) salts of fluoride (green line), dihydrogen phosphate (red line), and acetate (blue line) in acetonitrile.

## Absorption and Fluorescence spectra of PTP+F<sup>-</sup> with metals

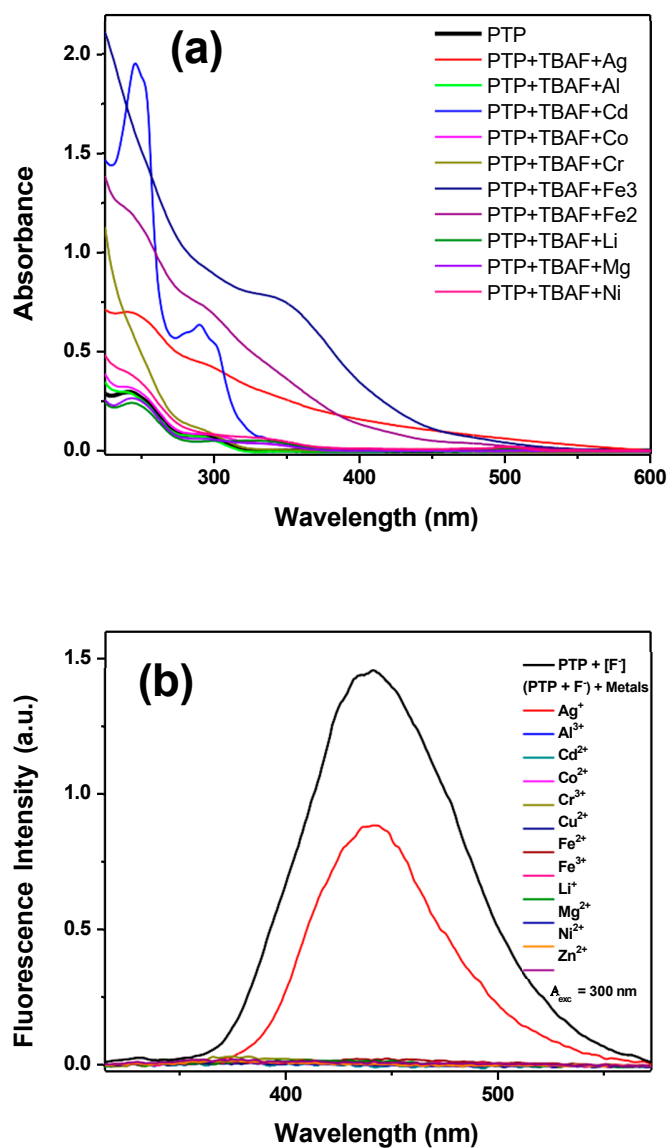

**Figure S4:** (a) Absorption and (b) fluorescence spectral variation of **PTP** when  $2.0 \times 10^{-5}$  mol/L of metal perchlorate salts were added to the **PTP**-fluoride ensemble in acetonitrile.



## PTP+TBAF+Silver

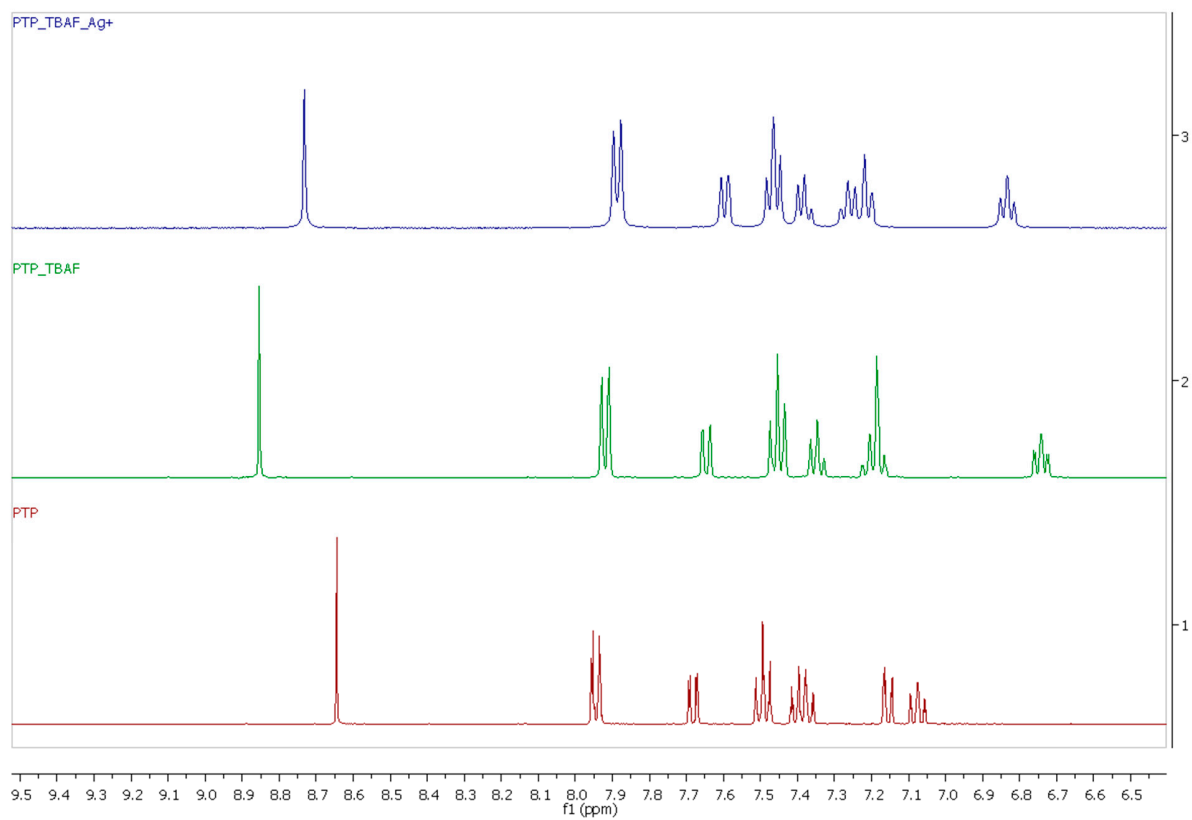

**Figure S5:** Stacked  $^1\text{H}$ -NMR spectra ( $^1\text{H}$  = 400 MHz,  $\text{CD}_3\text{CN}$ , RT) of **PTP**, **PTP+TBAF**, and **PTP+TBAF+Ag<sup>+</sup>** showing the expansion of aromatic region from 6.40 to 9.50 ppm.

## PTP+TBAF+Aluminum

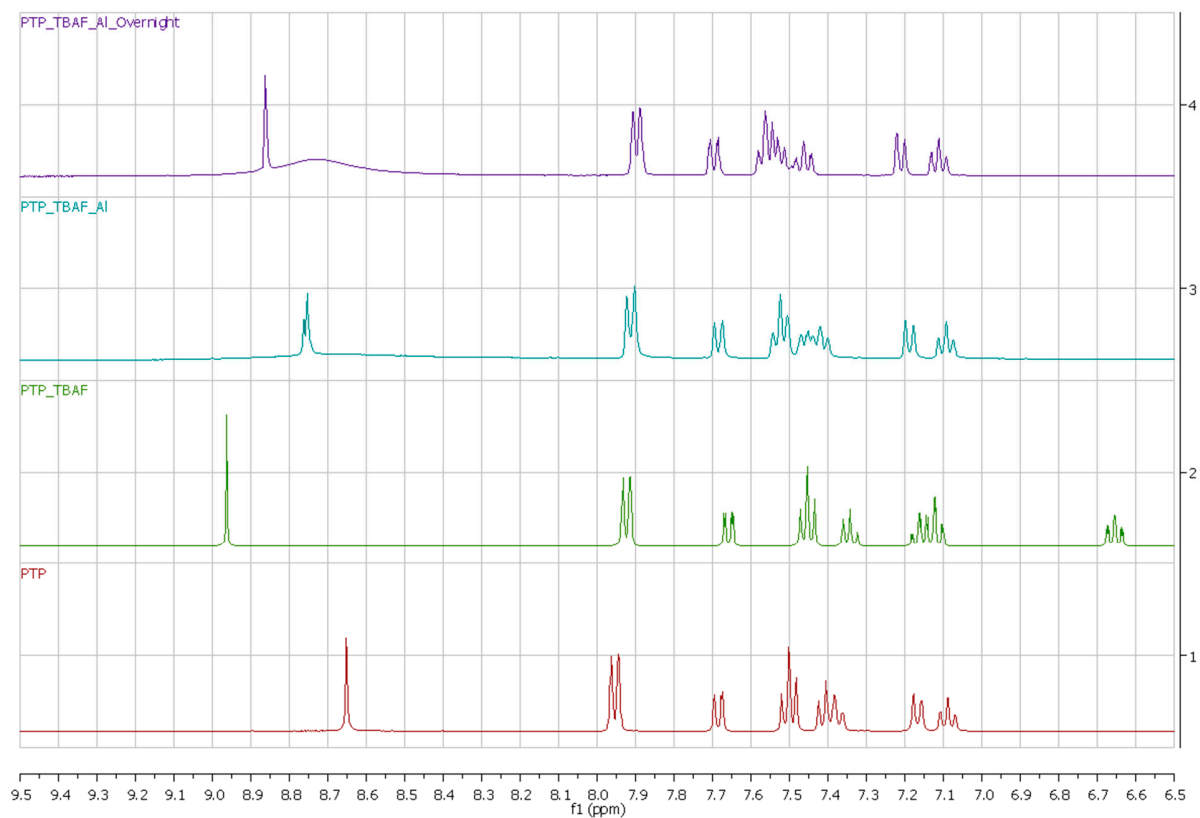

**Figure S6:** Stacked <sup>1</sup>H-NMR spectra (<sup>1</sup>H = 400 MHz, CD<sub>3</sub>CN, RT) of **PTP**, **PTP+TBAF**, **PTP+TBAF+Al<sup>3+</sup> (immediate)**, and **PTP+TBAF+Al<sup>3+</sup> (overnight)** showing the expansion of aromatic region from 6.50 to 9.50 ppm.

## PTP+TBAF+Cadmium

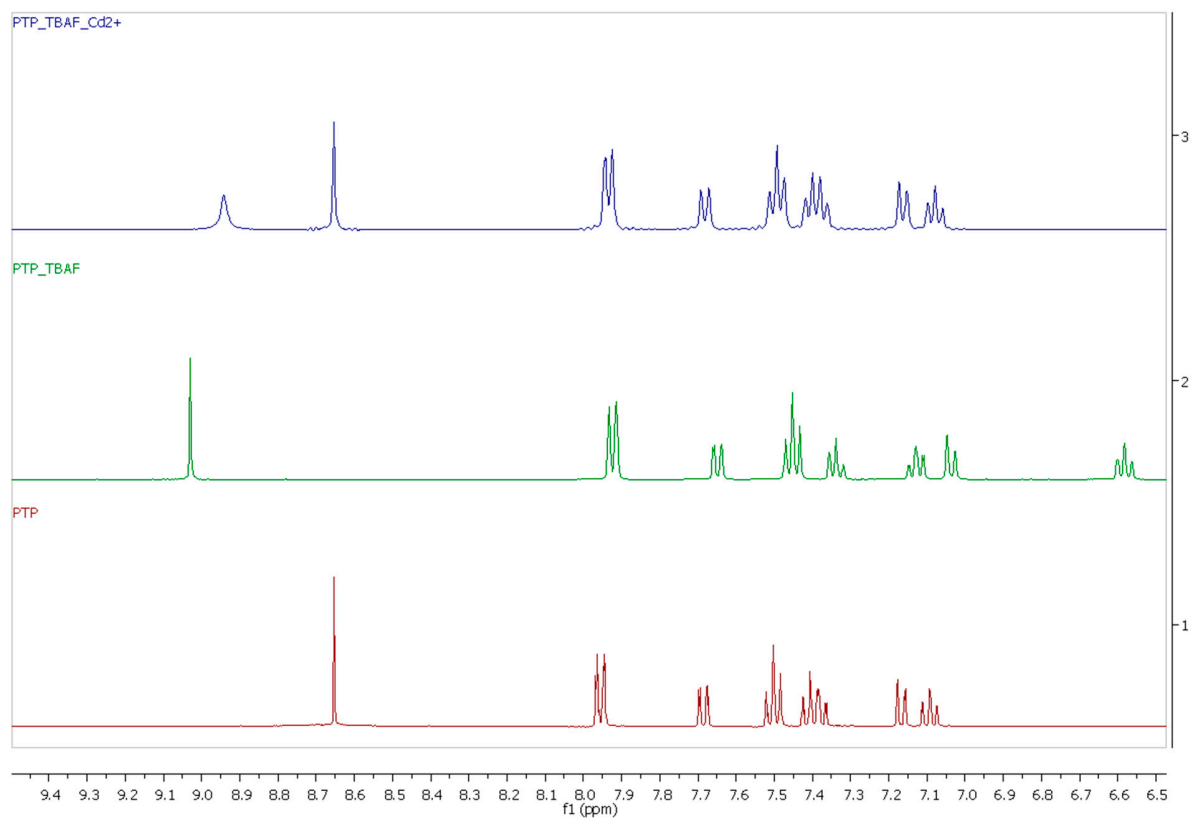

**Figure S7:** Stacked <sup>1</sup>H-NMR spectra (<sup>1</sup>H = 400 MHz, CD<sub>3</sub>CN, RT) of **PTP**, **PTP+TBAF**, and **PTP+TBAF+Cd<sup>2+</sup>** showing the expansion of aromatic region from 6.40 to 9.50 ppm.

## PTP+F+Chromium

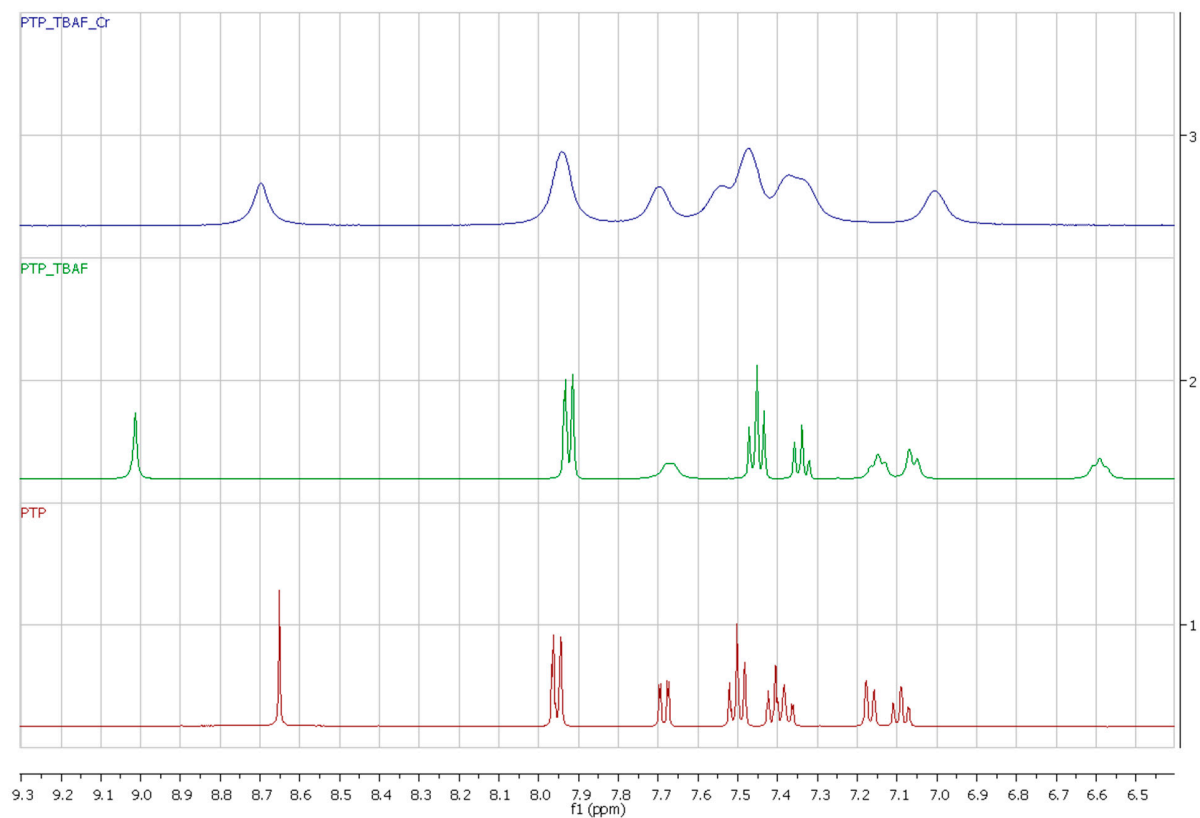

**Figure S8:** Stacked <sup>1</sup>H-NMR spectra (<sup>1</sup>H = 400 MHz, CD<sub>3</sub>CN, RT) of **PTP**, **PTP+TBAF**, and **PTP+TBAF+Cr<sup>3+</sup>** showing the expansion of aromatic region from 6.40 to 9.30 ppm.

### PTP+F+Iron (III)

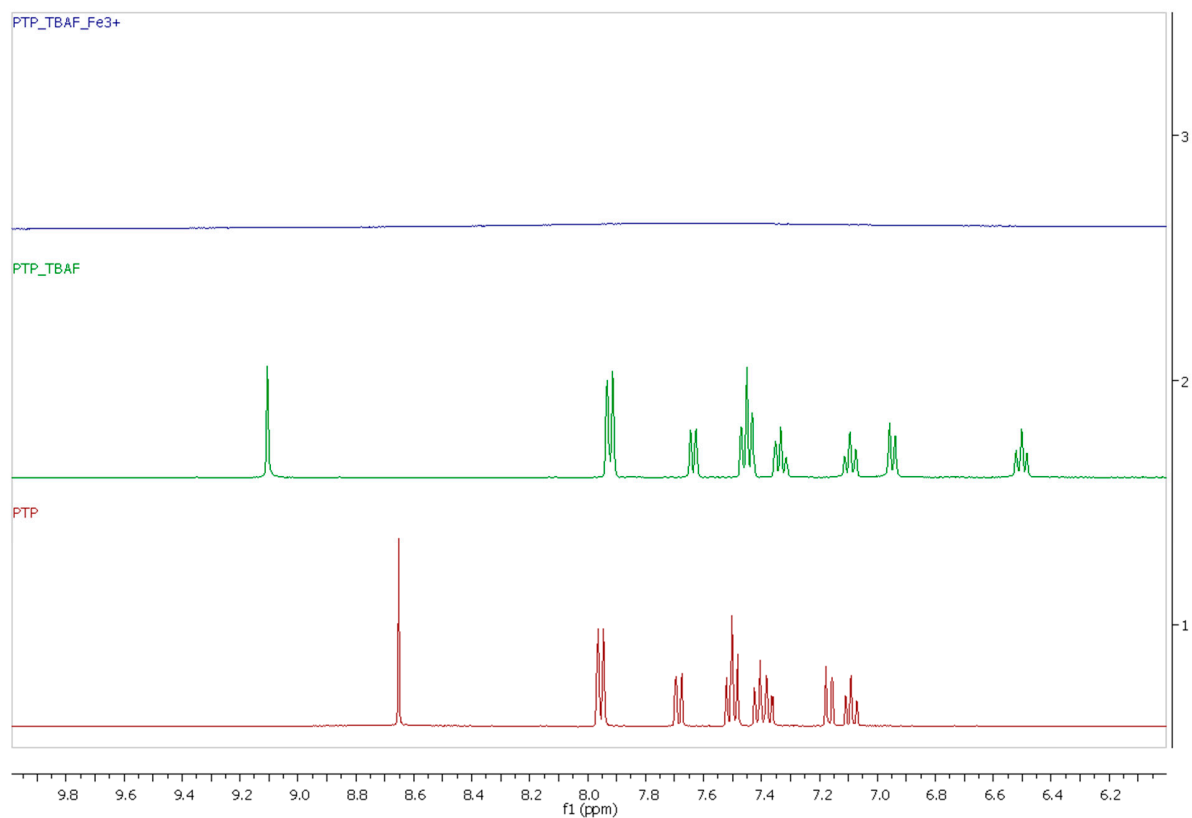

**Figure S9:** Stacked <sup>1</sup>H-NMR spectra (<sup>1</sup>H = 400 MHz, CD<sub>3</sub>CN, RT) of **PTP**, **PTP+TBAF**, and **PTP+TBAF+Fe<sup>3+</sup>** showing the expansion of aromatic region from 6.10 to 10.00 ppm.

## PTP+F+Iron (II)

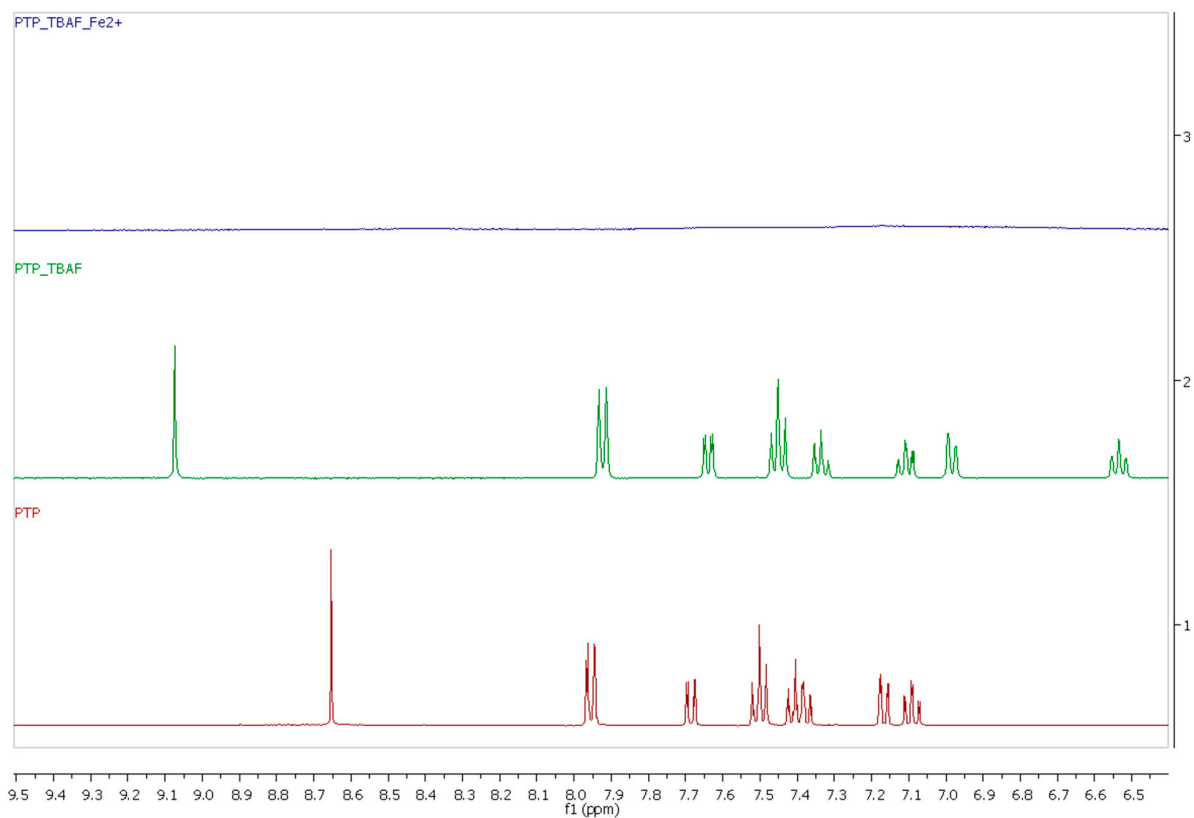

**Figure S10:** Stacked <sup>1</sup>H-NMR spectra (<sup>1</sup>H = 400 MHz, CD<sub>3</sub>CN, RT) of **PTP**, **PTP+TBAF**, and **PTP+TBAF+Fe<sup>2+</sup>** showing the expansion of aromatic region from 6.40 to 9.50 ppm.

## Benesi-Hildebrand (B-H) plots and calculation of equilibrium constants for the PTP-Fluoride-metals combination

**Figs. (a) and (b)  $Zn^{2+}$  system:**  $1/(F - F_0)$  was graphed against  $1/[Zn^{2+}]$  using equation 1, which yielded a linear plot, and the binding constant was determined from the slope.

$$1/(F - F_0) = 1/(F' - F_0) + 1/K_b \cdot 1/(F' - F_0) \cdot 1/[Zn^{2+}] \dots\dots (1)$$

Where  $F_0$ ,  $F$ , and  $F'$  are the fluorescence intensities of **PTP** at 430 nm in the absence, at an intermediate concentration, and at a concentration of complete saturation of **PTP** with  $Zn^{2+}$ , respectively.

The equilibrium constant ( $K_{eq}$ ) was calculated from the inverse slope of the linear plot of  $(F - F_0)/(F' - F)$  vs  $[Zn^{2+}]$ .

**Figs. (c) and (d)  $Cu^{2+}$  system:**  $1/(A - A_0)$  was graphed against  $1/[Cu^{2+}]$  using equation 2, which yielded a linear plot, and the binding constant was determined from the slope.

$$1/(A - A_0) = 1/(A' - A_0) + 1/K_b \cdot 1/(A' - A_0) \cdot 1/[Cu^{2+}] \dots\dots (2)$$

where  $A_0$ ,  $A$ , and  $A'$  are the absorbances of **PTP** at 345 nm in the absence, at an intermediate concentration, and at a concentration of complete saturation of **PTP** with  $Cu^{2+}$ , respectively.

The equilibrium constant ( $K_{eq}$ ) was calculated from the inverse slope of the linear plot of  $(A - A_0)/(A' - A)$  vs  $[Cu^{2+}]$ .

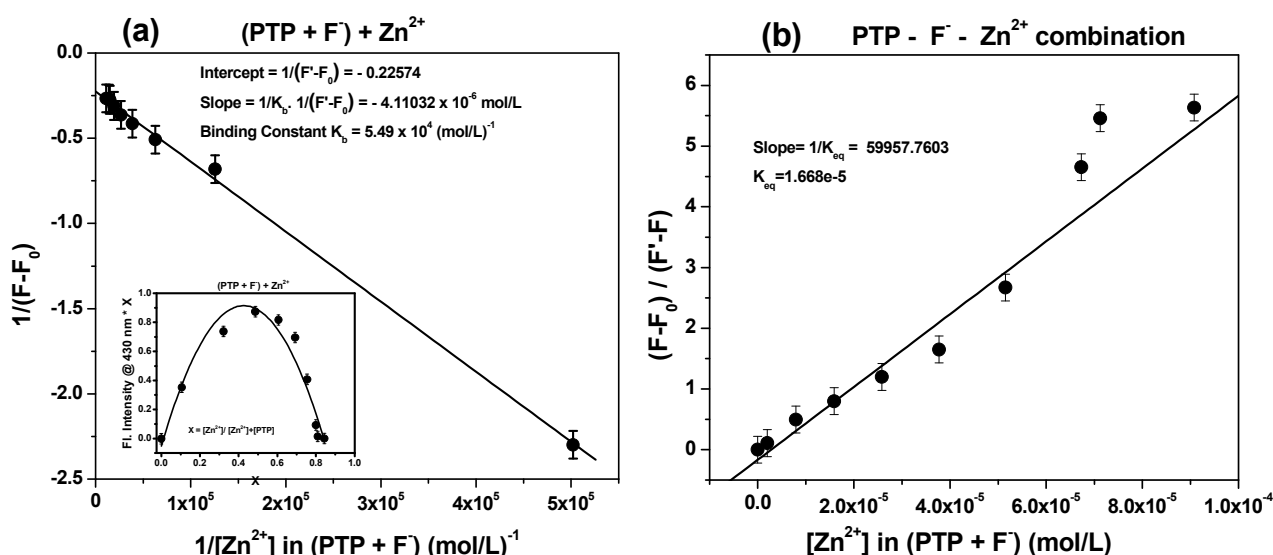

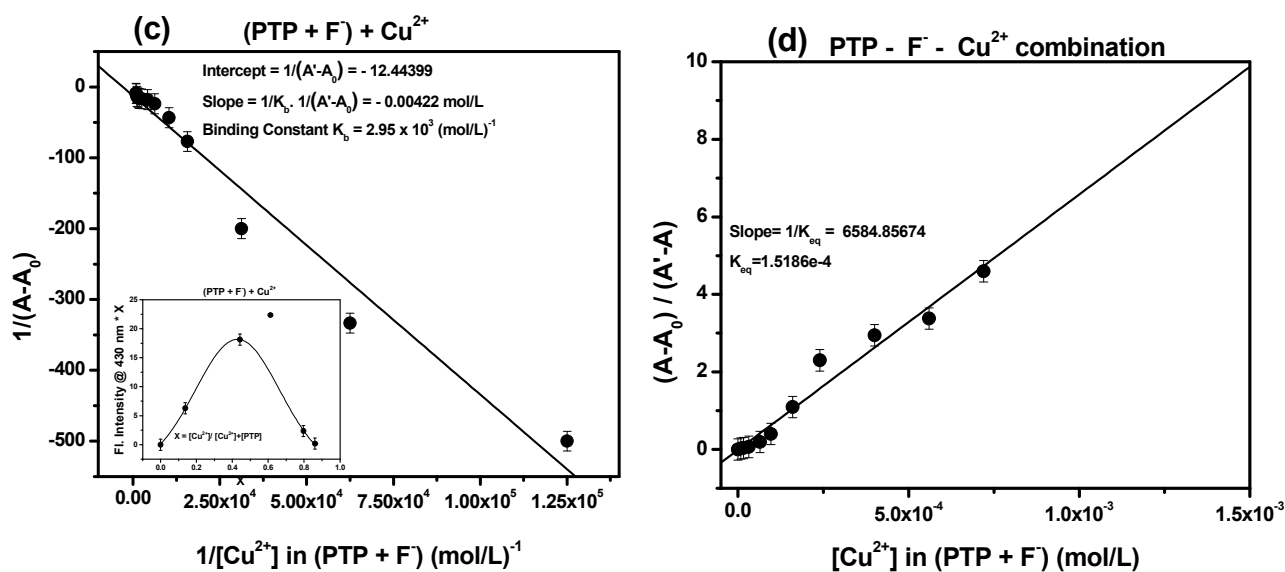

**Figure S11.** (a) and (c) represent Benesi-Hildebrand plots of **PTP** with the addition of Zinc and Copper perchlorate salts, respectively, in the **PTP**–fluoride complex, showing a linear relationship. (b) and (d) represent linear plots for the calculation of equilibrium constants ( $K_{eq}$ ) for the PTP–fluoride Zinc and Copper complexes, respectively. The insets of Figs. (a) and (c) depict Job's plot of  $Zn^{2+}$  and  $Cu^{2+}$ , respectively, in **PTP**–fluoride medium using fluorescence and absorbance data. For Zinc (II), the fluorescence decrease was monitored at 430 nm, whereas that for Copper (II) absorbance was monitored at 345 nm. The fluorescence or the absorbance was graphed against the mole fraction,  $[PTP]/[PTP+metals]$ . Both of them yielded a peak maximum of  $\sim 0.45$ , indicating a 1:1 interaction.



## Single Crystal X-ray spectroscopic study - PTP

**Table S1: Crystal data and structure refinement for PTP.**

|                                                |                                                                |
|------------------------------------------------|----------------------------------------------------------------|
| Identification code                            | PTP                                                            |
| Empirical formula                              | C <sub>14</sub> H <sub>11</sub> N <sub>3</sub> O               |
| Formula weight                                 | 237.26                                                         |
| Temperature/K                                  | 99.99(10)                                                      |
| Crystal system                                 | monoclinic                                                     |
| Space group                                    | Pn                                                             |
| a/Å                                            | 5.3970(3)                                                      |
| b/Å                                            | 5.2119(3)                                                      |
| c/Å                                            | 19.8612(13)                                                    |
| $\alpha/^\circ$                                | 90                                                             |
| $\beta/^\circ$                                 | 95.169(6)                                                      |
| $\gamma/^\circ$                                | 90                                                             |
| Volume/Å <sup>3</sup>                          | 556.40(6)                                                      |
| Z                                              | 2                                                              |
| $\rho_{\text{calc}}/\text{cm}^3$               | 1.416                                                          |
| $\mu/\text{mm}^{-1}$                           | 0.751                                                          |
| F(000)                                         | 248.0                                                          |
| Crystal size/mm <sup>3</sup>                   | 0.1 × 0.05 × 0.04                                              |
| Radiation                                      | Cu K $\alpha$ ( $\lambda$ = 1.54184)                           |
| 2 $\Theta$ range for data collection/ $^\circ$ | 8.942 to 136.398                                               |
| Index ranges                                   | -6 ≤ h ≤ 5, -6 ≤ k ≤ 6, -23 ≤ l ≤ 23                           |
| Reflections collected                          | 4233                                                           |
| Independent reflections                        | 1421 [ $R_{\text{int}}$ = 0.0275, $R_{\text{sigma}}$ = 0.0231] |
| Data/restraints/parameters                     | 1421/2/165                                                     |
| Goodness-of-fit on F <sup>2</sup>              | 1.265                                                          |
| Final R indexes [ $I \geq 2\sigma(I)$ ]        | $R_1$ = 0.0926, $wR_2$ = 0.2539                                |
| Final R indexes [all data]                     | $R_1$ = 0.0935, $wR_2$ = 0.2557                                |
| Largest diff. peak/hole / e Å <sup>-3</sup>    | 0.72/-0.51                                                     |
| Flack parameter                                | 1.3(11)                                                        |

**Table S2: Fractional Atomic Coordinates ( $\times 10^4$ ) and Equivalent Isotropic Displacement Parameters ( $\text{\AA}^2 \times 10^3$ ) for PTP.  $U_{eq}$  is defined as 1/3 of the trace of the orthogonalised  $U_{ij}$  tensor.**

| Atom | $x$        | $y$       | $z$      | $U(eq)$   |
|------|------------|-----------|----------|-----------|
| O1   | -3358 (10) | -397 (9)  | 6782 (3) | 47.6 (12) |
| N1   | 74 (11)    | 3648 (10) | 6979 (3) | 45.2 (13) |
| N2   | 1458 (11)  | 5832 (11) | 7076 (3) | 48.9 (15) |
| N3   | 2967 (12)  | 5900 (11) | 6594 (4) | 51.9 (16) |
| C1   | 2565 (12)  | 3819 (12) | 6171 (3) | 41.4 (15) |
| C2   | 697 (15)   | 2373 (12) | 6439 (4) | 47.8 (16) |
| C3   | -1700 (12) | 3074 (12) | 7450 (4) | 43.7 (15) |
| C4   | -3382 (14) | 1073 (12) | 7338 (3) | 45.7 (16) |
| C5   | -5142 (13) | 699 (11)  | 7807 (4) | 43.1 (15) |
| C6   | -5191 (13) | 2322 (13) | 8372 (4) | 46.7 (16) |
| C7   | -3502 (13) | 4208 (13) | 8481 (4) | 44.7 (16) |
| C8   | -1728 (13) | 4618 (12) | 8025 (4) | 45.4 (15) |
| C9   | 4020 (12)  | 3399 (12) | 5585 (4) | 43.8 (15) |
| C10  | 5962 (13)  | 5009 (13) | 5461 (4) | 47.0 (16) |
| C11  | 7304 (15)  | 4592 (14) | 4927 (4) | 49.4 (16) |
| C12  | 6777 (13)  | 2572 (13) | 4491 (4) | 47.7 (16) |
| C13  | 4791 (14)  | 947 (13)  | 4598 (4) | 48.7 (16) |
| C14  | 3412 (13)  | 1365 (13) | 5158 (4) | 46.2 (15) |

**Table S3: Anisotropic Displacement Parameters ( $\text{\AA}^2 \times 10^3$ ) for PTP. The Anisotropic displacement factor exponent takes the form:  $-2\pi^2[h^2a^{*2}U_{11}+2hka^*b^*U_{12}+\dots]$ .**

| Atom | $U_{11}$ | $U_{22}$ | $U_{33}$ | $U_{23}$ | $U_{13}$ | $U_{12}$   |
|------|----------|----------|----------|----------|----------|------------|
| O1   | 44 (2)   | 37 (2)   | 64 (3)   | -3 (2)   | 15 (2)   | -12.8 (18) |
| N1   | 46 (3)   | 31 (3)   | 60 (3)   | -1 (2)   | 12 (3)   | -7 (2)     |
| N2   | 46 (3)   | 38 (3)   | 65 (4)   | -5 (2)   | 17 (3)   | -8 (2)     |
| N3   | 52 (4)   | 38 (3)   | 67 (4)   | 3 (3)    | 17 (3)   | -10 (2)    |
| C1   | 38 (3)   | 41 (3)   | 48 (4)   | 5 (3)    | 19 (3)   | -1 (3)     |
| C2   | 46 (3)   | 36 (3)   | 63 (4)   | 1 (3)    | 11 (3)   | -11 (3)    |
| C3   | 40 (3)   | 32 (3)   | 61 (4)   | 5 (3)    | 12 (3)   | 3 (3)      |
| C4   | 53 (4)   | 36 (3)   | 48 (3)   | 4 (3)    | 8 (3)    | 13 (3)     |
| C5   | 50 (4)   | 26 (3)   | 54 (4)   | -3 (3)   | 13 (3)   | -6 (3)     |
| C6   | 48 (4)   | 38 (3)   | 57 (4)   | 2 (3)    | 18 (3)   | 6 (3)      |
| C7   | 44 (4)   | 34 (3)   | 58 (4)   | -5 (3)   | 14 (3)   | 1 (2)      |
| C8   | 40 (3)   | 33 (3)   | 65 (4)   | -1 (3)   | 14 (3)   | -7 (3)     |
| C9   | 42 (4)   | 33 (3)   | 58 (4)   | -3 (3)   | 10 (3)   | 4 (3)      |

**Table S3: Anisotropic Displacement Parameters ( $\text{\AA}^2 \times 10^3$ ) for PTP. The Anisotropic displacement factor exponent takes the form:  $-2\pi^2[h^2a^{*2}U_{11}+2hka^*b^*U_{12}+\dots]$ .**

| Atom | U <sub>11</sub> | U <sub>22</sub> | U <sub>33</sub> | U <sub>23</sub> | U <sub>13</sub> | U <sub>12</sub> |
|------|-----------------|-----------------|-----------------|-----------------|-----------------|-----------------|
| C10  | 43 (3)          | 37 (3)          | 63 (4)          | -3 (3)          | 15 (3)          | 0 (3)           |
| C11  | 49 (4)          | 39 (3)          | 62 (4)          | 2 (3)           | 14 (3)          | -1 (3)          |
| C12  | 43 (4)          | 47 (4)          | 55 (4)          | 2 (3)           | 15 (3)          | 5 (3)           |
| C13  | 47 (4)          | 35 (3)          | 66 (4)          | -4 (3)          | 19 (3)          | 4 (3)           |
| C14  | 47 (4)          | 37 (3)          | 57 (4)          | 0 (3)           | 15 (3)          | -5 (3)          |

**Table S4: Bond Lengths for PTP.**

| Atom | Atom | Length/ $\text{\AA}$ | Atom | Atom | Length/ $\text{\AA}$ |
|------|------|----------------------|------|------|----------------------|
| O1   | C4   | 1.344 (9)            | C4   | C5   | 1.403 (10)           |
| N1   | N2   | 1.365 (8)            | C5   | C6   | 1.407 (10)           |
| N1   | C2   | 1.331 (10)           | C6   | C7   | 1.345 (11)           |
| N1   | C3   | 1.428 (9)            | C7   | C8   | 1.392 (10)           |
| N2   | N3   | 1.313 (9)            | C9   | C10  | 1.382 (10)           |
| N3   | C1   | 1.376 (10)           | C9   | C14  | 1.379 (10)           |
| C1   | C2   | 1.401 (9)            | C10  | C11  | 1.355 (11)           |
| C1   | C9   | 1.479 (9)            | C11  | C12  | 1.377 (11)           |
| C3   | C4   | 1.388 (10)           | C12  | C13  | 1.397 (11)           |
| C3   | C8   | 1.399 (10)           | C13  | C14  | 1.409 (10)           |

**Table S5: Bond Angles for PTP.**

| Atom | Atom | Atom | Angle/ $^\circ$ | Atom | Atom | Atom | Angle/ $^\circ$ |
|------|------|------|-----------------|------|------|------|-----------------|
| N2   | N1   | C3   | 118.2 (6)       | C3   | C4   | C5   | 118.1 (6)       |
| C2   | N1   | N2   | 110.8 (6)       | C4   | C5   | C6   | 120.6 (6)       |
| C2   | N1   | C3   | 131.0 (6)       | C7   | C6   | C5   | 120.4 (7)       |
| N3   | N2   | N1   | 106.7 (6)       | C6   | C7   | C8   | 120.3 (6)       |
| N2   | N3   | C1   | 110.5 (6)       | C7   | C8   | C3   | 120.1 (6)       |
| N3   | C1   | C2   | 105.7 (6)       | C10  | C9   | C1   | 121.0 (6)       |
| N3   | C1   | C9   | 122.1 (6)       | C14  | C9   | C1   | 119.0 (6)       |
| C2   | C1   | C9   | 132.2 (7)       | C14  | C9   | C10  | 120.0 (7)       |
| N1   | C2   | C1   | 106.3 (6)       | C11  | C10  | C9   | 120.6 (7)       |
| C4   | C3   | N1   | 121.4 (6)       | C10  | C11  | C12  | 121.4 (7)       |
| C4   | C3   | C8   | 120.5 (6)       | C11  | C12  | C13  | 119.1 (7)       |
| C8   | C3   | N1   | 118.1 (6)       | C12  | C13  | C14  | 119.5 (7)       |
| O1   | C4   | C3   | 120.3 (7)       | C9   | C14  | C13  | 119.4 (6)       |
| O1   | C4   | C5   | 121.6 (6)       |      |      |      |                 |

**Table S6: Hydrogen Bonds for PTP.**

| D  | H  | A               | d(D-H)/Å | d(H-A)/Å | d(D-A)/Å | D-H-A/° |
|----|----|-----------------|----------|----------|----------|---------|
| O1 | H1 | N3 <sup>1</sup> | 0.84     | 1.97     | 2.769(8) | 157.5   |

<sup>1</sup>-1+X,-1+Y,+Z**Table S7: Torsion Angles for PTP.**

| A  | B  | C   | D   | Angle/°   | A   | B   | C   | D   | Angle/°   |
|----|----|-----|-----|-----------|-----|-----|-----|-----|-----------|
| O1 | C4 | C5  | C6  | -177.6(6) | C2  | C1  | C9  | C10 | -173.5(8) |
| N1 | N2 | N3  | C1  | 1.2(8)    | C2  | C1  | C9  | C14 | 6.6(11)   |
| N1 | C3 | C4  | O1  | 0.7(10)   | C3  | N1  | N2  | N3  | 178.6(6)  |
| N1 | C3 | C4  | C5  | -177.2(6) | C3  | N1  | C2  | C1  | -179.4(7) |
| N1 | C3 | C8  | C7  | 176.9(7)  | C3  | C4  | C5  | C6  | 0.2(9)    |
| N2 | N1 | C2  | C1  | -0.5(8)   | C4  | C3  | C8  | C7  | -2.1(10)  |
| N2 | N1 | C3  | C4  | 171.8(6)  | C4  | C5  | C6  | C7  | -2.0(10)  |
| N2 | N1 | C3  | C8  | -7.1(9)   | C5  | C6  | C7  | C8  | 1.7(11)   |
| N2 | N3 | C1  | C2  | -1.5(8)   | C6  | C7  | C8  | C3  | 0.3(11)   |
| N2 | N3 | C1  | C9  | -179.6(6) | C8  | C3  | C4  | O1  | 179.6(6)  |
| N3 | C1 | C2  | N1  | 1.1(8)    | C8  | C3  | C4  | C5  | 1.8(9)    |
| N3 | C1 | C9  | C10 | 4.1(10)   | C9  | C1  | C2  | N1  | 179.0(7)  |
| N3 | C1 | C9  | C14 | -175.8(7) | C9  | C10 | C11 | C12 | 0.3(11)   |
| C1 | C9 | C10 | C11 | 179.2(7)  | C10 | C9  | C14 | C13 | 0.2(10)   |
| C1 | C9 | C14 | C13 | -179.9(7) | C10 | C11 | C12 | C13 | 1.0(11)   |
| C2 | N1 | N2  | N3  | -0.4(8)   | C11 | C12 | C13 | C14 | -1.7(11)  |
| C2 | N1 | C3  | C4  | -9.3(11)  | C12 | C13 | C14 | C9  | 1.1(11)   |
| C2 | N1 | C3  | C8  | 171.8(7)  | C14 | C9  | C10 | C11 | -0.9(10)  |

**Table S8: Hydrogen Atom Coordinates (Å×10<sup>4</sup>) and Isotropic Displacement Parameters (Å<sup>2</sup>×10<sup>3</sup>) for PTP.**

| Atom | x        | y        | z       | U(eq) |
|------|----------|----------|---------|-------|
| H1   | -4726.26 | -1162.76 | 6712.28 | 71    |
| H2   | 12.18    | 797.7    | 6269.37 | 57    |
| H5   | -6310.48 | -661.25  | 7742.8  | 52    |
| H6   | -6425.27 | 2083.06  | 8678.64 | 56    |
| H7   | -3519.77 | 5264.77  | 8870.08 | 54    |
| H8   | -534.47  | 5948.49  | 8105.23 | 54    |
| H10  | 6359.78  | 6421.79  | 5753.17 | 56    |
| H11  | 8636.88  | 5717.07  | 4851.9  | 59    |

**Table S8: Hydrogen Atom Coordinates ( $\text{\AA} \times 10^4$ ) and Isotropic Displacement Parameters ( $\text{\AA}^2 \times 10^3$ ) for PTP.**

| Atom | <i>x</i> | <i>y</i> | <i>z</i> | U(eq) |
|------|----------|----------|----------|-------|
| H12  | 7750.91  | 2286.05  | 4122.87  | 57    |
| H13  | 4372.7   | -430.02  | 4295.27  | 58    |
| H14  | 2075.19  | 255.72   | 5239.75  | 55    |

## Experimental

Single crystals of PTP were collected through slow evaporation of dichloromethane. A suitable crystal was selected and mounted on a **Rigaku XtaLAB Synergy-i XRD** diffractometer and processed using CrysAlis Pro (Rigaku) software [2]. The crystal was kept at 100 K during data collection. Using Olex2 [3], the structure was solved with the SHELXT [4] structure solution program using Intrinsic Phasing and refined with the SHELXL [5] refinement package using Least Squares minimization.

2. Rigaku. O.D. CrysAlis Pro, Oxford Diffraction/Agilent Technologies UK Ltd: Yarnton, England (2018)
3. Dolomanov, O.V., Bourhis, L.J., Gildea, R.J, Howard, J.A.K. & Puschmann, H. (2009), J. Appl. Cryst. 42, 339-341.
4. Sheldrick, G.M. (2015). Acta Cryst. A71, 3-8.
5. Sheldrick, G.M. (2015). Acta Cryst. C71, 3-8.

This report was created with Olex2, compiled on 2023.07.18 svn.rf166f9f3 for OlexSys. Please [let us know](#) if there are any errors or if you would like to have additional features.
